# Supplementary material for: PEER CONNECT: a pragmatic feasibility randomised controlled trial of peer coaching for adults with long-term conditions
Source: HighWire-hosted journal article supplement (doi:10.1136/bmjopen-2024-087020), 2024-08-01
Supplement: bmjopen-2024-087020supp005_data_supplement.pdf [file bmjopen-2024-087020supp005_data_supplement.pdf]

Summary statistics for condition-specific outcomes at each time point overall and by allocated group.

|                          |            | Allocation         |        |       |      |                         |        |        |       |                  |        |       |      |
|--------------------------|------------|--------------------|--------|-------|------|-------------------------|--------|--------|-------|------------------|--------|-------|------|
|                          |            | Control<br>(N = 2) |        |       |      | Intervention<br>(N = 5) |        |        |       | Total<br>(N = 7) |        |       |      |
| Variable                 | Time-point | N                  | Median | Min   | Max  | N                       | Median | Min    | Max   | N                | Median | Min   | Max  |
| BPI - worst pain         | Baseline   | 2                  | 8.5    | [8.0, | 9.0] | 3                       | 8.0    | [4.0,  | 9.0]  | 5                | 8.0    | [4.0, | 9.0] |
|                          | 6-months   | 2                  | 7.5    | [7.0, | 8.0] | 2                       | 6.0    | [4.0,  | 8.0]  | 4                | 7.5    | [4.0, | 8.0] |
|                          | 9-months   | 2                  | 8.0    | [8.0, | 8.0] | 2                       | 6.0    | [3.0,  | 9.0]  | 4                | 8.0    | [3.0, | 9.0] |
| BPI - least pain         | Baseline   | 2                  | 5.0    | [4.0, | 6.0] | 3                       | 3.0    | [1.0,  | 7.0]  | 5                | 4.0    | [1.0, | 7.0] |
|                          | 6-months   | 2                  | 4.0    | [4.0, | 4.0] | 2                       | 4.0    | [1.0,  | 7.0]  | 4                | 4.0    | [1.0, | 7.0] |
|                          | 9-months   | 2                  | 4.5    | [3.0, | 6.0] | 2                       | 4.0    | [1.0,  | 7.0]  | 4                | 4.5    | [1.0, | 7.0] |
| BPI - average pain       | Baseline   | 2                  | 7.0    | [6.0, | 8.0] | 3                       | 5.0    | [1.0,  | 7.0]  | 5                | 6.0    | [1.0, | 8.0] |
|                          | 6-months   | 2                  | 6.5    | [6.0, | 7.0] | 2                       | 5.0    | [3.0,  | 7.0]  | 4                | 6.5    | [3.0, | 7.0] |
|                          | 9-months   | 2                  | 6.0    | [5.0, | 7.0] | 2                       | 4.5    | [2.0,  | 7.0]  | 4                | 6.0    | [2.0, | 7.0] |
| BPI - pain now           | Baseline   | 2                  | 6.5    | [5.0, | 8.0] | 3                       | 6.0    | [2.0,  | 7.0]  | 5                | 6.0    | [2.0, | 8.0] |
|                          | 6-months   | 2                  | 5.5    | [5.0, | 6.0] | 2                       | 5.5    | [4.0,  | 7.0]  | 4                | 5.5    | [4.0, | 7.0] |
|                          | 9-months   | 2                  | 7.0    | [6.0, | 8.0] | 2                       | 5.0    | [1.0,  | 9.0]  | 4                | 7.0    | [1.0, | 9.0] |
| MSIS-physical score      | Baseline   | 0                  |        |       |      | 2                       | 42.0   | [38.0, | 46.0] |                  |        |       |      |
|                          | 6-months   | 0                  |        |       |      | 2                       | 37.0   | [36.0, | 38.0] |                  |        |       |      |
|                          | 9-months   | 0                  |        |       |      | 1                       |        | 39.0   |       |                  |        |       |      |
| MSIS-psychological score | Baseline   | 0                  |        |       |      | 2                       | 30.5   | [30.0, | 31.0] |                  |        |       |      |
|                          | 6-months   | 0                  |        |       |      | 2                       | 18.0   | [7.0,  | 11.0] |                  |        |       |      |
|                          | 9-months   | 0                  |        |       |      | 1                       |        | 22.0   |       |                  |        |       |      |

Legend: BPI, Brief Pain Inventory; MSIS, Multiple Sclerosis Impact Scale-29v2
